# Supplementary material for: Glucose-sensitive acetylation of Seryl tRNA synthetase regulates lipid synthesis in breast cancer
Source: PubMed Central journal article supplement (PMC8368063; doi:10.1038/s41392-021-00714-0), 2021-08-16
Supplement: 41392_2021_714_MOESM5_ESM.pdf [file 41392_2021_714_MOESM5_ESM.pdf]

| Expected RT | m/z (Expected) | Compound          | Con-     | Tet-OFF  | Tet-ON   |
|-------------|----------------|-------------------|----------|----------|----------|
| 1.82        | 199.1698       | FA(12:0)*C12H24O2 | 0.00E+00 | 1.74E+07 | 1.26E+07 |
| 1.82        | 200.1732       | FA(12:0)*m1       | 0.00E+00 | 1.70E+06 | 2.50E+05 |
| 2.84        | 227.2011       | FA(14:0)*C14H28O2 | 0.00E+00 | 7.52E+07 | 3.93E+07 |
| 2.84        | 228.2045       | FA(14:0)*m1       | 0.00E+00 | 6.42E+05 | 0.00E+00 |
| 2.09        | 221.1542       | FA(14:3)*C14H22O2 | 0.00E+00 | 1.01E+08 | 5.26E+07 |
| 2.09        | 222.1575       | FA(14:3)*m1       | 0.00E+00 | 9.70E+05 | 2.97E+06 |
| 3.7         | 241.2168       | FA(15:0)*C15H30O2 | 0.00E+00 | 2.79E+07 | 1.22E+07 |
| 3.7         | 242.2201       | FA(15:0)*m1       | 0.00E+00 | 6.12E+05 | 3.77E+05 |
| 4.85        | 255.2324       | FA(16:0)*C16H32O2 | 0.00E+00 | 3.14E+09 | 1.88E+09 |
| 4.85        | 256.2358       | FA(16:0)*m1       | 0.00E+00 | 1.10E+07 | 2.54E+06 |
| 4.85        | 257.2391       | FA(16:0)*m2       | 0.00E+00 | 4.23E+06 | 1.50E+06 |
| 4.85        | 258.2425       | FA(16:0)*m3       | 0.00E+00 | 3.23E+06 | 1.94E+06 |
| 4.85        | 259.2458       | FA(16:0)*m4       | 0.00E+00 | 5.04E+06 | 2.16E+06 |
| 4.85        | 260.2492       | FA(16:0)*m5       | 0.00E+00 | 1.73E+06 | 6.73E+05 |
| 4.85        | 261.2525       | FA(16:0)*m6       | 0.00E+00 | 1.16E+07 | 5.35E+06 |
| 4.85        | 262.2559       | FA(16:0)*m7       | 0.00E+00 | 2.70E+06 | 1.83E+06 |
| 4.85        | 263.2592       | FA(16:0)*m8       | 0.00E+00 | 1.64E+07 | 7.62E+06 |
| 4.85        | 264.2626       | FA(16:0)*m9       | 0.00E+00 | 4.64E+06 | 1.89E+06 |
| 4.85        | 265.2659       | FA(16:0)*m10      | 0.00E+00 | 2.01E+07 | 8.61E+06 |
| 4.85        | 266.2693       | FA(16:0)*m11      | 0.00E+00 | 3.49E+06 | 1.30E+06 |
| 4.85        | 267.2726       | FA(16:0)*m12      | 0.00E+00 | 1.42E+07 | 5.77E+06 |
| 4.85        | 268.276        | FA(16:0)*m13      | 0.00E+00 | 1.78E+06 | 9.08E+05 |
| 4.85        | 269.2793       | FA(16:0)*m14      | 0.00E+00 | 9.35E+06 | 3.91E+06 |
| 3.31        | 253.2168       | FA(16:1)*C16H30O2 | 0.00E+00 | 2.45E+07 | 7.56E+06 |
| 3.31        | 254.2201       | FA(16:1)*m1       | 0.00E+00 | 0.00E+00 | 0.00E+00 |
| 6.12        | 269.2481       | FA(17:0)*C17H34O2 | 0.00E+00 | 3.83E+07 | 1.75E+07 |
| 6.12        | 270.2514       | FA(17:0)*m1       | 0.00E+00 | 0.00E+00 | 1.03E+06 |
| 7.43        | 283.2637       | FA(18:0)*C18H36O2 | 0.00E+00 | 3.22E+09 | 1.88E+09 |
| 7.43        | 284.2671       | FA(18:0)*m1       | 0.00E+00 | 1.67E+06 | 4.05E+06 |
| 7.43        | 285.2704       | FA(18:0)*m2       | 0.00E+00 | 3.21E+07 | 1.17E+07 |
| 7.43        | 286.2738       | FA(18:0)*m3       | 0.00E+00 | 8.09E+06 | 4.55E+06 |
| 7.43        | 287.2771       | FA(18:0)*m4       | 0.00E+00 | 4.37E+06 | 1.77E+06 |
| 7.43        | 288.2805       | FA(18:0)*m5       | 0.00E+00 | 9.79E+05 | 4.44E+05 |
| 7.43        | 289.2838       | FA(18:0)*m6       | 0.00E+00 | 6.29E+06 | 2.72E+06 |
| 7.43        | 290.2872       | FA(18:0)*m7       | 0.00E+00 | 2.13E+06 | 9.30E+05 |
| 7.43        | 291.2905       | FA(18:0)*m8       | 0.00E+00 | 1.37E+07 | 6.81E+06 |
| 7.43        | 292.2939       | FA(18:0)*m9       | 0.00E+00 | 3.67E+06 | 1.42E+06 |
| 7.43        | 293.2972       | FA(18:0)*m10      | 0.00E+00 | 2.15E+07 | 8.53E+06 |
| 7.43        | 294.3006       | FA(18:0)*m11      | 0.00E+00 | 8.95E+06 | 3.00E+06 |
| 7.43        | 295.3039       | FA(18:0)*m12      | 0.00E+00 | 1.84E+07 | 8.09E+06 |
| 7.43        | 296.3073       | FA(18:0)*m13      | 0.00E+00 | 4.40E+06 | 2.04E+06 |

|       |          |                   |          |          |          |
|-------|----------|-------------------|----------|----------|----------|
| 7.43  | 297.3106 | FA(18:0)*m14      | 0.00E+00 | 1.43E+07 | 6.31E+06 |
| 7.43  | 298.314  | FA(18:0)*m15      | 0.00E+00 | 2.79E+06 | 7.86E+05 |
| 7.43  | 299.3173 | FA(18:0)*m16      | 0.00E+00 | 5.53E+06 | 2.67E+06 |
| 5.3   | 281.2481 | FA(18:1)*C18H34O2 | 0.00E+00 | 3.15E+08 | 1.50E+08 |
| 5.3   | 282.2514 | FA(18:1)*m1       | 0.00E+00 | 2.46E+05 | 0.00E+00 |
| 5.3   | 287.2682 | FA(18:1)*m6       | 0.00E+00 | 1.96E+06 | 7.18E+05 |
| 5.3   | 289.2749 | FA(18:1)*m8       | 0.00E+00 | 3.28E+06 | 1.17E+06 |
| 5.3   | 290.2782 | FA(18:1)*m9       | 0.00E+00 | 9.30E+05 | 0.00E+00 |
| 5.3   | 291.2816 | FA(18:1)*m10      | 0.00E+00 | 8.51E+06 | 3.39E+06 |
| 5.3   | 292.2849 | FA(18:1)*m11      | 0.00E+00 | 1.10E+06 | 3.00E+05 |
| 5.3   | 293.2883 | FA(18:1)*m12      | 0.00E+00 | 7.57E+06 | 0.00E+00 |
| 3.62  | 279.2324 | FA(18:2)*C18H32O2 | 0.00E+00 | 1.07E+08 | 5.27E+07 |
| 3.62  | 280.2358 | FA(18:2)*m1       | 0.00E+00 | 0.00E+00 | 1.01E+06 |
| 8.74  | 297.2794 | FA(19:0)*C19H38O2 | 0.00E+00 | 1.22E+07 | 5.16E+06 |
| 8.74  | 298.2827 | FA(19:0)*m1       | 0.00E+00 | 0.00E+00 | 1.04E+06 |
| 9.86  | 311.295  | FA(20:0)*C20H40O2 | 0.00E+00 | 1.31E+08 | 7.00E+07 |
| 9.86  | 312.2984 | FA(20:0)*m1       | 0.00E+00 | 0.00E+00 | 3.12E+06 |
| 9.86  | 313.3017 | FA(20:0)*m2       | 0.00E+00 | 1.17E+07 | 4.47E+06 |
| 7.7   | 309.2794 | FA(20:1)*C20H38O2 | 0.00E+00 | 2.77E+07 | 1.33E+07 |
| 7.7   | 310.2827 | FA(20:1)*m1       | 0.00E+00 | 2.58E+06 | 3.05E+06 |
| 3.31  | 303.2324 | FA(20:4)*C20H32O2 | 0.00E+00 | 7.69E+06 | 2.62E+06 |
| 3.31  | 304.2358 | FA(20:4)*m1       | 0.00E+00 | 3.49E+05 | 8.45E+05 |
| 3.31  | 305.2391 | FA(20:4)*m2       | 0.00E+00 | 3.59E+05 | 0.00E+00 |
| 10.65 | 339.3263 | FA(22:0)*C22H44O2 | 0.00E+00 | 2.11E+08 | 1.69E+08 |
| 10.65 | 340.3297 | FA(22:0)*m1       | 0.00E+00 | 3.39E+06 | 2.55E+06 |
| 10.65 | 341.333  | FA(22:0)*m2       | 0.00E+00 | 5.27E+06 | 4.90E+06 |
| 9.88  | 337.3107 | FA(22:1)*C22H42O2 | 0.00E+00 | 1.20E+07 | 6.01E+06 |
| 9.88  | 338.314  | FA(22:1)*m1       | 0.00E+00 | 1.52E+06 | 1.28E+06 |
| 3.64  | 329.2481 | FA(22:5)*C22H34O2 | 0.00E+00 | 8.90E+06 | 3.49E+06 |
| 3.64  | 330.2514 | FA(22:5)*m1       | 0.00E+00 | 3.01E+05 | 2.75E+05 |
| 2.79  | 327.2324 | FA(22:6)*C22H32O2 | 0.00E+00 | 5.68E+06 | 1.61E+06 |
| 2.79  | 328.2358 | FA(22:6)*m1       | 0.00E+00 | 2.06E+05 | 0.00E+00 |
| 10.81 | 353.342  | FA(23:0)*C23H46O2 | 0.00E+00 | 9.02E+07 | 7.06E+07 |
| 10.81 | 354.3453 | FA(23:0)*m1       | 0.00E+00 | 0.00E+00 | 0.00E+00 |
| 10.95 | 367.3576 | FA(24:0)*C24H48O2 | 0.00E+00 | 2.78E+08 | 2.35E+08 |
| 10.95 | 368.361  | FA(24:0)*m1       | 0.00E+00 | 3.07E+06 | 0.00E+00 |
| 10.95 | 369.3643 | FA(24:0)*m2       | 0.00E+00 | 1.29E+07 | 9.61E+06 |

|       |          |                   |          |          |          |
|-------|----------|-------------------|----------|----------|----------|
| 10.95 | 371.371  | FA(24:0)*m4       | 0.00E+00 | 1.50E+07 | 1.20E+07 |
| 10.95 | 372.3744 | FA(24:0)*m5       | 0.00E+00 | 4.19E+06 | 3.33E+06 |
| 10.95 | 373.3777 | FA(24:0)*m6       | 0.00E+00 | 1.06E+07 | 1.02E+07 |
| 10.63 | 365.342  | FA(24:1)*C24H46O2 | 0.00E+00 | 5.21E+07 | 2.85E+07 |
| 10.63 | 366.3453 | FA(24:1)*m1       | 0.00E+00 | 2.70E+06 | 2.23E+06 |
| 11.05 | 381.3733 | FA(25:0)*C25H50O2 | 0.00E+00 | 1.02E+08 | 6.98E+07 |
| 11.05 | 382.3766 | FA(25:0)*m1       | 0.00E+00 | 0.00E+00 | 1.88E+05 |
| 11.16 | 395.3889 | FA(26:0)*C26H52O2 | 0.00E+00 | 1.53E+08 | 9.14E+07 |
| 11.16 | 396.3923 | FA(26:0)*m1       | 0.00E+00 | 2.61E+06 | 0.00E+00 |
| 11.16 | 397.3956 | FA(26:0)*m2       | 0.00E+00 | 1.65E+07 | 1.15E+07 |
| 11.16 | 398.399  | FA(26:0)*m3       | 0.00E+00 | 4.40E+06 | 3.29E+06 |
| 11.16 | 399.4023 | FA(26:0)*m4       | 0.00E+00 | 1.70E+07 | 1.34E+07 |
| 11.16 | 400.4057 | FA(26:0)*m5       | 0.00E+00 | 5.19E+06 | 3.66E+06 |
| 11.16 | 401.409  | FA(26:0)*m6       | 0.00E+00 | 1.65E+07 | 1.31E+07 |
| 11.16 | 402.4124 | FA(26:0)*m7       | 0.00E+00 | 4.52E+06 | 3.37E+06 |
| 11.16 | 403.4157 | FA(26:0)*m8       | 0.00E+00 | 1.12E+07 | 7.67E+06 |
| 11.16 | 404.4191 | FA(26:0)*m9       | 0.00E+00 | 2.04E+06 | 1.61E+06 |
| 11.16 | 405.4224 | FA(26:0)*m10      | 0.00E+00 | 6.89E+06 | 4.12E+06 |
| 11.16 | 411.4425 | FA(26:0)*m16      | 0.00E+00 | 9.25E+06 | 6.66E+06 |
| 11.16 | 412.4459 | FA(26:0)*m17      | 0.00E+00 | 2.07E+06 | 1.26E+06 |
| 10.93 | 393.3733 | FA(26:1)*C26H50O2 | 0.00E+00 | 2.23E+07 | 1.93E+07 |
| 10.93 | 396.3833 | FA(26:1)*m3       | 0.00E+00 | 2.71E+06 | 2.45E+06 |
| 10.93 | 397.3867 | FA(26:1)*m4       | 0.00E+00 | 8.33E+06 | 7.14E+06 |
| 10.93 | 398.39   | FA(26:1)*m5       | 0.00E+00 | 2.01E+06 | 1.69E+06 |
| 10.93 | 399.3934 | FA(26:1)*m6       | 0.00E+00 | 7.03E+06 | 6.66E+06 |
| 10.93 | 400.3967 | FA(26:1)*m7       | 0.00E+00 | 1.64E+06 | 9.78E+05 |
| 10.93 | 401.4001 | FA(26:1)*m8       | 0.00E+00 | 5.98E+06 | 2.19E+06 |
| 11.31 | 423.4202 | FA(28:0)*C28H56O2 | 0.00E+00 | 6.33E+07 | 4.95E+07 |
| 11.31 | 424.4236 | FA(28:0)*m1       | 0.00E+00 | 0.00E+00 | 0.00E+00 |
| 11.42 | 451.4515 | FA(30:0)*C30H60O2 | 0.00E+00 | 3.21E+07 | 1.75E+07 |
| 11.42 | 452.4549 | FA(30:0)*m1       | 0.00E+00 | 0.00E+00 | 0.00E+00 |
